# Supplementary material for: Peptidomic Fingerprints of Stored UHT Milk Inoculated with Protease Extracts from Different Pseudomonas Strains Relative to aprX Expression and Visible Spoilage
Source: MDPI journal article supplement (doi:10.3390/dairy4010005), 2023-01-09
Supplement: s1 [file s1]

## Supplementary Materials

**Table S1.** Bacterial growth of the four studied strains

| Species (Strain)                                  | Bacterial count*<br>[CFU/mL] |
|---------------------------------------------------|------------------------------|
| <i>Pseudomonas panacis</i> (DSM 18529)            | $8.0 \times 10^9$            |
| <i>Pseudomonas weihenstephanensis</i> (DSM 29166) | $8.0 \times 10^8$            |
| <i>Pseudomonas fluorescens</i> (DSM 50090)        | $9.8 \times 10^9$            |
| <i>Pseudomonas fluorescens</i> (DSM 50120)        | $3.2 \times 10^9$            |

\*Bacterial growth measured in TSA (24 h, 30 °C) after initial culture in TSB (24 h, 30 °C)

**Table S2.** Number of identified peptides and their log transformed ion intensities formed in UHT milk during storage after inoculation with extracellular extracts from each of the four studied *Pseudomonas* strains as determined by peptidomic analyses using timsTOF Pro nanoLC-MS/MS.

| Sample                                 |                        | Control  |          | <i>P. panacis</i><br>DSM 18529 |         | <i>P. weihenstephanensis</i><br>DSM 29166 |         | <i>P. fluorescens</i><br>DSM 50090 |         | <i>P. fluorescens</i><br>DSM 50120 |         |
|----------------------------------------|------------------------|----------|----------|--------------------------------|---------|-------------------------------------------|---------|------------------------------------|---------|------------------------------------|---------|
| Storage Time (days)                    |                        | 0        | 45       | 0                              | 45      | 0                                         | 45      | 0                                  | 45      | 0                                  | 45      |
| Number<br>of<br>identified<br>peptides | $\beta$ -casein        | 159 ± 21 | 326 ± 13 | 71 ± 7                         | 693 ± 9 | 129 ± 1                                   | 499 ± 4 | 45 ± 7                             | 182 ± 8 | 74 ± 2                             | 186 ± 8 |
|                                        | $\alpha$ s1-casein     | 103 ± 5  | 168 ± 4  | 64 ± 2                         | 343 ± 2 | 86 ± 2                                    | 235 ± 1 | 38 ± 2                             | 102 ± 4 | 57 ± 1                             | 96 ± 0  |
|                                        | $\alpha$ s2-casein     | 50 ± 1   | 84 ± 4   | 36 ± 4                         | 136 ± 3 | 54 ± 2                                    | 138 ± 5 | 17 ± 4                             | 51 ± 1  | 38 ± 1                             | 45 ± 0  |
|                                        | $\kappa$ -casein       | 39 ± 2   | 93 ± 1   | 20 ± 4                         | 124 ± 3 | 34 ± 1                                    | 119 ± 5 | 11 ± 2                             | 46 ± 3  | 29 ± 1                             | 43 ± 4  |
|                                        | $\beta$ -lactoglobulin | 25 ± 0   | 51 ± 2   | 15 ± 1                         | 97 ± 2  | 24 ± 0                                    | 73 ± 1  | 9 ± 0                              | 21 ± 3  | 13 ± 2                             | 21 ± 2  |
| Ion<br>Intensity<br>(Log10)            | $\beta$ -casein        | 6.02     | 6.52     | 5.66                           | 7.36    | 5.87                                      | 6.95    | 5.43                               | 6.25    | 5.66                               | 6.32    |
|                                        | $\alpha$ s1-casein     | 5.64     | 5.86     | 5.47                           | 6.95    | 5.50                                      | 6.36    | 4.88                               | 5.71    | 5.27                               | 5.69    |
|                                        | $\alpha$ s2-casein     | 5.45     | 5.63     | 4.91                           | 5.95    | 5.68                                      | 6.06    | 4.55                               | 5.43    | 5.61                               | 5.50    |
|                                        | $\kappa$ -casein       | 4.93     | 5.56     | 4.83                           | 5.86    | 5.15                                      | 5.61    | 4.60                               | 5.29    | 5.20                               | 5.43    |
|                                        | $\beta$ -lactoglobulin | 5.29     | 5.39     | 5.04                           | 6.03    | 5.15                                      | 5.72    | 4.71                               | 5.16    | 4.86                               | 5.32    |

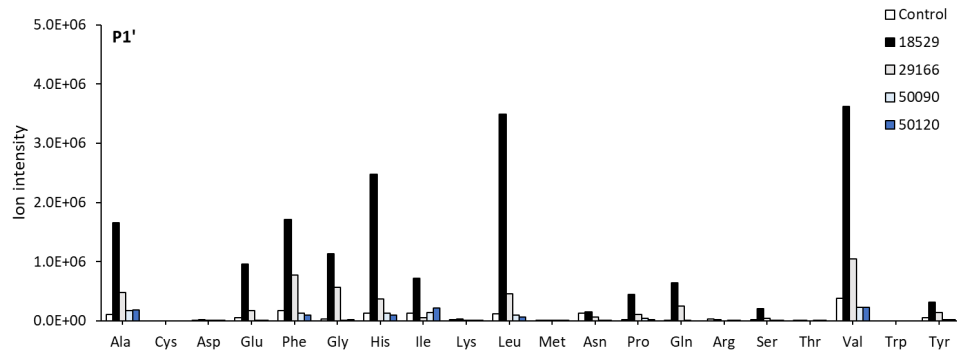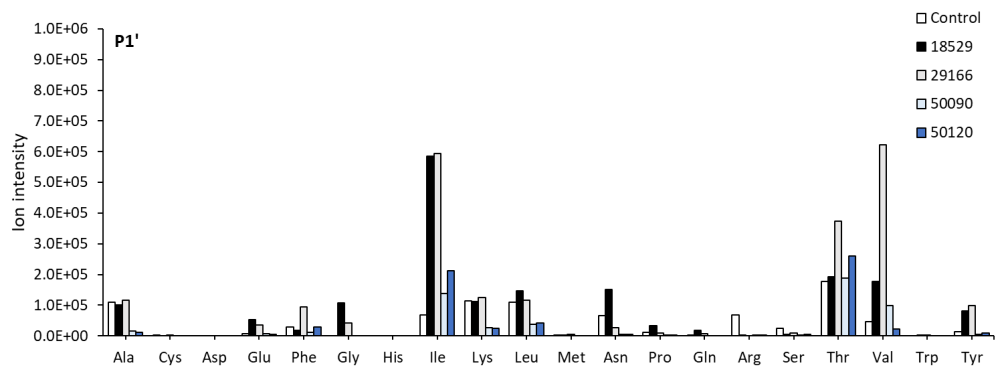

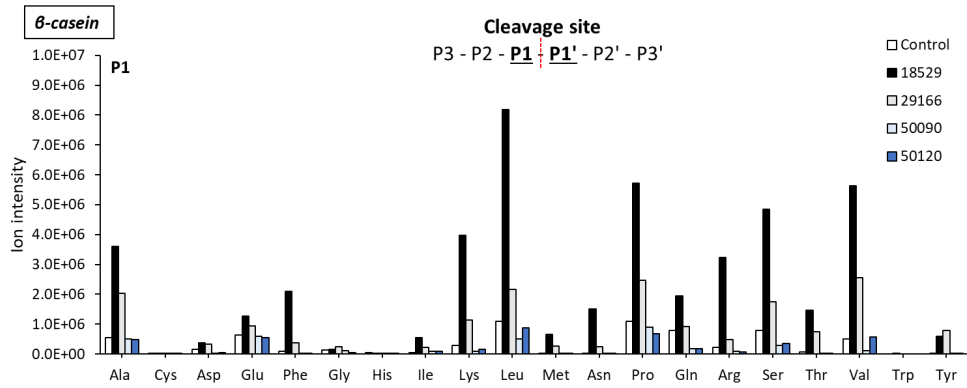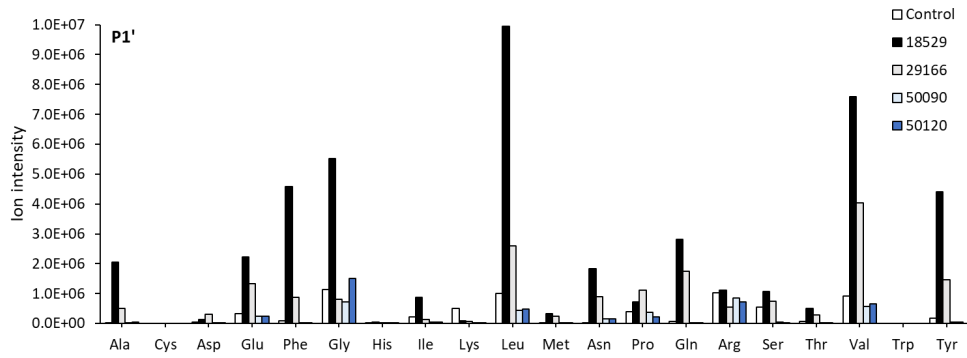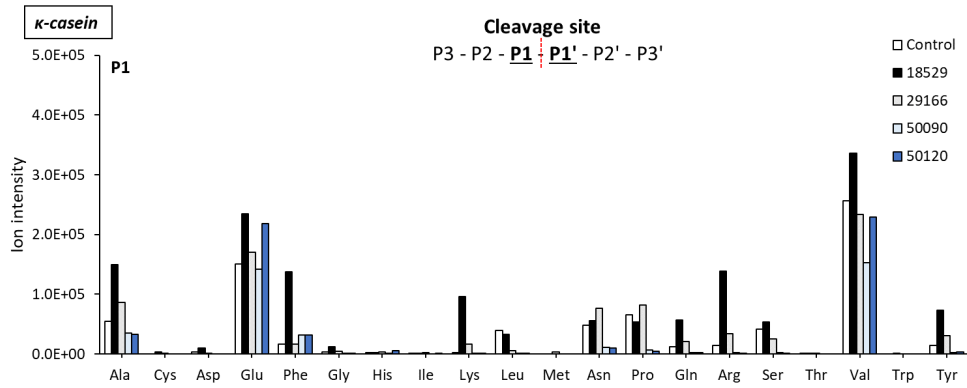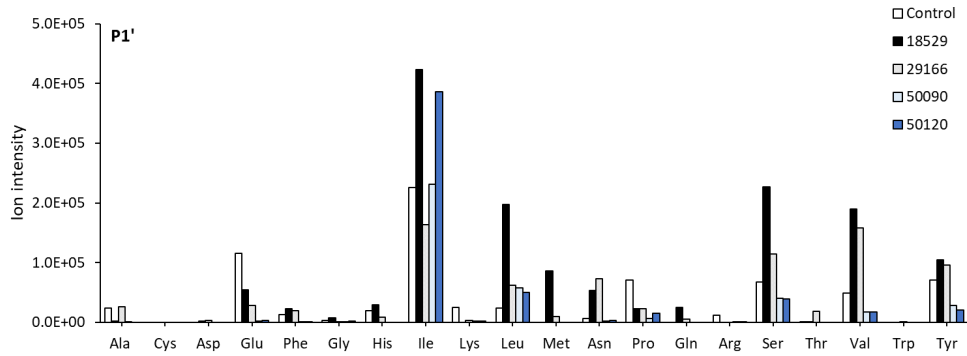

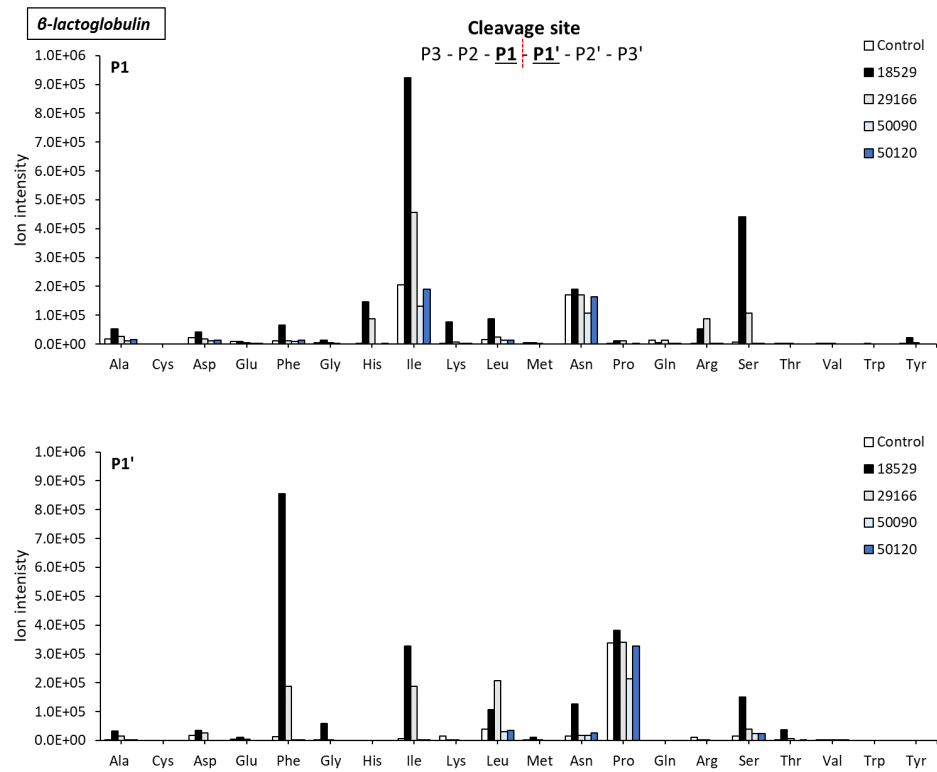

**Figure S1.** Total ion intensities of peptides distributed according to their P1 and P1' cleavage sites in the five individual major milk proteins per strain and control after 45 days of skimmed UHT milk storage based on extracted peptides subjected to nano timsTOF Pro LC-MS/MS peptidomics.
